# Supplementary material for: Metabolomic Profiles in Starved Light Breed Horses during the Refeeding Process
Source: MDPI journal article supplement (doi:10.3390/ani12192527), 2022-09-21
Supplement: s1 [file s1]

# Metabolomic Profiles in Starved Light Breed Horses During the Refeeding Process

Sawyer C. Main <sup>1</sup>, Lindsay P. Brown <sup>2,\*</sup>, Kelly R. Melvin <sup>1</sup>, Shawn R. Campagna <sup>2,3</sup>, Brynn H. Voy <sup>1,4</sup>, Hector F. Castro <sup>2,3</sup>, Lewrell G. Strickland <sup>1,5</sup>, Melissa T. Hines <sup>5</sup>, Robert D. Jacobs <sup>6</sup>, Mary E. Gordon <sup>6</sup> and Jennie L. Z. Ivey <sup>1,\*</sup>

<sup>1</sup> Department of Animal Science, University of Tennessee, 2506 River Drive, Knoxville, TN 37996, USA

<sup>2</sup> Department of Chemistry, University of Tennessee, 1420 Circle Drive, Knoxville, TN 37996, USA

<sup>3</sup> Biological and Small Molecule Mass Spectrometry Core, University of Tennessee, 1416 Circle Drive, Knoxville, TN 37996, USA

<sup>4</sup> Department of Nutrition, University of Tennessee, 1215 W. Cumberland Ave., Knoxville, TN 37996, USA

<sup>5</sup> College of Veterinary Medicine, University of Tennessee, 2407 River Drive, Knoxville, TN 37996, USA

<sup>6</sup> Purina Animal Nutrition, 100 Danforth Drive, Gray Summit, MO 63039, USA

\* Correspondence: lbrow121@vols.utk.edu (L.P.B.); jzivey@utk.edu (J.L.Z.I.); Tel.: +1-865-974-3141 (L.P.B.); +1-865-974-3157 (J.L.Z.I.)

**Table S1.** Metaboanalyst results from T-Test comparisons between CCP and RP for blood chemistries (plasma)

| <b>Analyte</b> | <b>t.stat</b> | <b>p.value</b> | <b>FDR</b> |
|----------------|---------------|----------------|------------|
| CREAT          | -2.0819       | 0.04051        | 0.28524    |
| ALB            | -2.0757       | 0.041096       | 0.28524    |
| LDH            | -1.899        | 0.061123       | 0.28524    |
| AST            | -1.6905       | 0.094774       | 0.33171    |

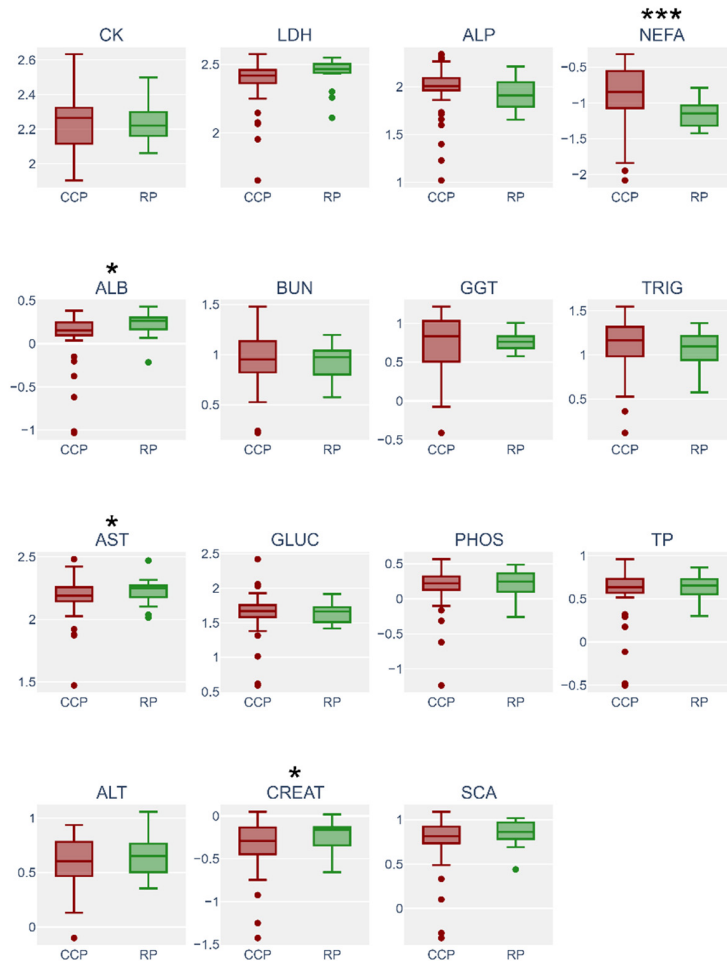

**Figure S1.** Box plots of blood serum data conveying the differences between the CCP and RP. Asterisks represent statistical significance (p value  $\leq 0.1$  = \*; p value  $\leq 0.05$  = \*\*; p value  $\leq 0.01$  = \*\*\*). LDH: lactate dehydrogenase (p value 0.07), U/L; ALP: alkaline phosphatase, U/L; ALB: albumin (p value 0.06), g/dL; BUN: blood urea nitrogen, mg/dL; GGT: gamma-glutamyl transferase, U/L; AST: aspartate amino transferase, U/L; TP: total protein, g/dL; GLUC: glucose, mg/dL; PHOS: phosphate, mg/dL; ALT: alanine transaminase, U/L; CREAT: creatinine (p value 0.08), mg/dL; TRIG: triglycerides, mg/dL; CK: creatinine kinase, U/L; NEFA: non-esterified fatty acids (p value 0.006), mEq/L; SCA: serum calcium, mg/dL

**Table S2.** Metaboanalyst results from T-Test comparisons between diet (C vs. S) for blood chemistries (plasma)

| <b>Analyte</b> | <b>t.stat</b> | <b>p.value</b> | <b>FDR</b> |
|----------------|---------------|----------------|------------|
| BUN            | -3.1391       | 0.002364       | 0.033102   |
| Phos           | -2.7717       | 0.006916       | 0.048412   |
| TP             | -2.3217       | 0.022765       | 0.10624    |
| ALB            | -1.9277       | 0.057404       | 0.16412    |
| GLUC           | -1.8552       | 0.067205       | 0.16412    |
| LDH            | -1.8339       | 0.070336       | 0.16412    |

**Table S3.** Metaboanalyst results from T-Test comparisons between sex (mare vs. gelding) for blood chemistries (plasma)

| <b>Analyte</b> | <b>t.stat</b> | <b>p.value</b> | <b>FDR</b> |
|----------------|---------------|----------------|------------|
| CREAT          | 2.8082        | 0.006241       | 0.047123   |
| Phos           | 2.7092        | 0.008228       | 0.047123   |
| ALB            | 2.6343        | 0.010098       | 0.047123   |

**Table S4.** Metaboanalyst results from T-Test comparisons between age group (below 20 vs. 20 and above) for blood chemistries (plasma)

| <b>Analyte</b> | <b>t.stat</b> | <b>p.value</b> | <b>FDR</b> |
|----------------|---------------|----------------|------------|
| Phos           | -3.7581       | 0.000322       | 0.004503   |
| ALB            | -3.1685       | 0.002162       | 0.015134   |
| LDH            | -2.4968       | 0.01456        | 0.067946   |
| TP             | -2.0713       | 0.041513       | 0.14528    |
| ALT            | 1.9732        | 0.051884       | 0.14528    |
| BUN            | -1.7888       | 0.077386       | 0.18057    |

**Table S5.** Metaboanalyst results from T-Test comparisons between diet (C vs. S) for blood chemistries (serum)

| <b>Analyte</b> | <b>t.stat</b> | <b>p.value</b> | <b>FDR</b> |
|----------------|---------------|----------------|------------|
| BUN            | -2.5498       | 0.012687       | 0.10881    |
| PHOS           | -2.5235       | 0.013601       | 0.10881    |
| TP             | -2.1816       | 0.032076       | 0.17107    |
| ALT            | 2.026         | 0.0461         | 0.1844     |
| SCA            | -1.867        | 0.065564       | 0.2098     |
| ALB            | -1.7397       | 0.085757       | 0.22868    |

**Table S6.** Metaboanalyst results from T-Test comparisons between sex (mare vs. gelding) for blood chemistries (serum)

| <b>Analyte</b> | <b>t.stat</b> | <b>p.value</b> | <b>FDR</b> |
|----------------|---------------|----------------|------------|
| PHOS           | 3.1301        | 0.00244        | 0.022982   |
| ALB            | 3.0758        | 0.002873       | 0.022982   |
| CREAT          | 2.9336        | 0.00437        | 0.023309   |
| TRIG           | 2.2569        | 0.026744       | 0.10698    |
| SCA            | 1.8891        | 0.062502       | 0.20001    |
| CK             | 1.6753        | 0.097773       | 0.22348    |

**Table S7.** Metaboanalyst results from T-Test comparisons between age group (below 20 vs. 20 and above) for blood chemistries (serum)

| <b>Analyte</b> | <b>t.stat</b> | <b>p.value</b> | <b>FDR</b> |
|----------------|---------------|----------------|------------|
| PHOS           | -3.6473       | 0.00047        | 0.007525   |
| ALT            | 3.194         | 0.002008       | 0.012152   |
| ALB            | -3.1526       | 0.002279       | 0.012152   |
| SCA            | -2.1607       | 0.033709       | 0.11742    |
| TP             | -2.0545       | 0.043193       | 0.11742    |
| CK             | -1.978        | 0.051371       | 0.11742    |
| LDH            | -1.7817       | 0.078587       | 0.15717    |

**Table S8.** Fold change analysis for RP compared to CCP (RP/CCP) for metabolomics data

| <b>Metabolite</b>           | <b>Fold change<br/>(RP/CCP)</b> | <b>p.value</b> |
|-----------------------------|---------------------------------|----------------|
| alpha-Ketoglutarate         | 0.724568                        | 0.196767       |
| Uric acid                   | 0.598083                        | 0.078713       |
| Indoleacrylate              | 0.631762                        | 0.2454         |
| Allantoin                   | 0.372438                        | 0.009124       |
| Uridine                     | 0.542886                        | 0.036214       |
| S-Adenosyl-L-methioninamine | 0.97674                         | 0.93986        |
| Xylose                      | 0.770332                        | 0.115634       |
| Taurine                     | 0.668531                        | 0.197207       |
| Arginine                    | 0.892785                        | 0.491743       |
| Tryptophan                  | 1.045125                        | 0.743274       |
| Serine                      | 0.774025                        | 0.214143       |
| Creatine                    | 0.295335                        | 0.001054       |
| Citrulline                  | 1.166122                        | 0.518447       |
| Alanine/Sarcosine           | 0.461614                        | 0.002627       |
| Valine/betaine              | 0.687569                        | 0.201204       |
| Tyrosine                    | 0.828572                        | 0.362614       |
| Proline                     | 0.888966                        | 0.530212       |
| Phenylalanine               | 0.681895                        | 0.098501       |
| Ornithine                   | 1.056064                        | 0.83341        |
| Cystine                     | 0.988447                        | 0.96667        |
| N-Acetylornithine           | 3.842559                        | 0.000283       |
| Methionine                  | 0.545381                        | 0.03917        |
| Homoserine/Threonine        | 0.774824                        | 0.297029       |
| Glutamine                   | 0.611119                        | 0.085949       |
| Cystathionine               | 0.777079                        | 0.10732        |
| Creatinine                  | 0.911952                        | 0.63489        |

**Table S9.** Metaboanalyst results from T-Test comparisons between diet (C vs. S) for metabolites

| <b>Metabolite</b>           | <b>t.stat</b> | <b>p.value</b> | <b>FDR</b> |
|-----------------------------|---------------|----------------|------------|
| N-Acetylornithine           | 3.5499        | 0.000628       | 0.14928    |
| 254.1395                    | -3.3856       | 0.001072       | 0.14928    |
| Taurine                     | 3.3077        | 0.001374       | 0.14928    |
| 380.2437                    | -3.2342       | 0.001732       | 0.14928    |
| 199.1335                    | -3.1841       | 0.002022       | 0.14928    |
| 243.1234                    | -3.1719       | 0.0021         | 0.14928    |
| Glutamine                   | 3.1629        | 0.002159       | 0.14928    |
| 261.1339                    | -3.1014       | 0.002605       | 0.15759    |
| Cystine                     | 3.0386        | 0.003148       | 0.16928    |
| 449.2626                    | -2.9641       | 0.003926       | 0.19004    |
| Citrulline                  | 2.9155        | 0.004528       | 0.19922    |
| 459.3049                    | -2.8684       | 0.005189       | 0.20929    |
| S-Adenosyl-L-methioninamine | 2.835         | 0.005712       | 0.21265    |
| Ornithine                   | 2.799         | 0.006328       | 0.21338    |
| 414.3332                    | -2.7264       | 0.007758       | 0.21338    |
| 211.1336                    | -2.6854       | 0.008692       | 0.21338    |
| Methionine                  | 2.6707        | 0.00905        | 0.21338    |
| 336.1812                    | 2.661         | 0.009296       | 0.21338    |
| 326.2331                    | 2.647         | 0.009659       | 0.21338    |
| Homoserine/Threonine        | 2.6369        | 0.009927       | 0.21338    |
| 238.1445                    | 2.623         | 0.01031        | 0.21338    |
| 361.2703                    | 2.6217        | 0.010346       | 0.21338    |
| 432.2746                    | -2.616        | 0.010508       | 0.21338    |
| 384.2386                    | -2.6134       | 0.010581       | 0.21338    |
| 270.2072                    | -2.5864       | 0.011381       | 0.21515    |
| 216.1600                    | -2.5745       | 0.011749       | 0.21515    |
| 243.1233                    | -2.5655       | 0.012035       | 0.21515    |
| Uridine                     | 2.5486        | 0.012591       | 0.21515    |
| 252.1602                    | -2.5397       | 0.012891       | 0.21515    |
| 329.2159                    | -2.5107       | 0.013922       | 0.22232    |
| 142.1234                    | -2.5021       | 0.014239       | 0.22232    |
| 271.2103                    | -2.4569       | 0.016025       | 0.23216    |
| Valine/betaine              | 2.4472        | 0.016431       | 0.23216    |
| alpha-Ketoglutarate         | 2.4397        | 0.016753       | 0.23216    |
| 242.1112                    | -2.424        | 0.017448       | 0.23216    |
| 229.1633                    | -2.4113       | 0.018026       | 0.23216    |
| 369.2747                    | 2.4044        | 0.018348       | 0.23216    |
| 356.2436                    | -2.3987       | 0.018614       | 0.23216    |
| 252.1237                    | -2.3968       | 0.018707       | 0.23216    |
| 408.2749                    | -2.3444       | 0.021363       | 0.25257    |
| 356.2435                    | -2.336        | 0.021816       | 0.25257    |
| Serine                      | 2.3268        | 0.022325       | 0.25257    |

|                   |         |          |         |
|-------------------|---------|----------|---------|
| 286.2018          | -2.3236 | 0.022506 | 0.25257 |
| 501.3041          | -2.3006 | 0.023836 | 0.25257 |
| 222.1493          | -2.2982 | 0.023978 | 0.25257 |
| 268.1913          | -2.2977 | 0.024005 | 0.25257 |
| 413.2650          | 2.2855  | 0.024741 | 0.25395 |
| 220.0975          | 2.2783  | 0.025185 | 0.25395 |
| 186.1495          | -2.2439 | 0.027405 | 0.26287 |
| 264.2157          | -2.2356 | 0.027967 | 0.26287 |
| 466.2911          | -2.229  | 0.02842  | 0.26287 |
| 151.0873          | -2.2189 | 0.029128 | 0.26287 |
| 188.1006          | -2.2177 | 0.02921  | 0.26287 |
| 202.1081          | -2.2113 | 0.029667 | 0.26287 |
| 209.0040          | -2.2048 | 0.030139 | 0.26287 |
| 305.1754          | -2.201  | 0.030415 | 0.26287 |
| 217.0293          | 2.1636  | 0.033268 | 0.28249 |
| 369.2392          | -2.1363 | 0.035496 | 0.29566 |
| 477.3249          | -2.1299 | 0.036041 | 0.29566 |
| 392.2436          | -2.1171 | 0.037137 | 0.29957 |
| 140.0714          | -2.0935 | 0.039254 | 0.30601 |
| 209.1542          | -2.0773 | 0.040759 | 0.30601 |
| 191.0711          | -2.0773 | 0.04076  | 0.30601 |
| Alanine/Sarcosine | 2.074   | 0.041073 | 0.30601 |
| 306.1787          | -2.0705 | 0.0414   | 0.30601 |
| 116.9722          | -2.0639 | 0.042039 | 0.30601 |
| 251.1523          | -2.0549 | 0.04292  | 0.30601 |
| 307.1547          | 2.0542  | 0.042994 | 0.30601 |
| 374.9682          | 2.0362  | 0.044809 | 0.30867 |
| 175.0858          | -2.0327 | 0.045165 | 0.30867 |
| 215.1284          | -2.0239 | 0.046083 | 0.30867 |
| 270.1342          | -2.0239 | 0.046088 | 0.30867 |
| 322.2015          | -2.0169 | 0.046826 | 0.30867 |
| 125.7532          | -2.0135 | 0.047193 | 0.30867 |
| 146.8665          | -2.0066 | 0.047928 | 0.3093  |
| 334.2381          | -1.9782 | 0.051112 | 0.32114 |
| 369.1158          | 1.972   | 0.051823 | 0.32114 |
| 307.1581          | 1.9697  | 0.052093 | 0.32114 |
| 360.2578          | -1.9669 | 0.052417 | 0.32114 |
| 429.2963          | -1.9457 | 0.054958 | 0.32884 |
| 598.4149          | -1.9451 | 0.055034 | 0.32884 |
| 360.9761          | 1.9339  | 0.056414 | 0.33056 |
| 450.2857          | -1.9261 | 0.057392 | 0.33056 |
| 283.1029          | -1.9236 | 0.057707 | 0.33056 |
| 230.1756          | -1.9192 | 0.058277 | 0.33056 |
| 278.1756          | -1.9156 | 0.058736 | 0.33056 |
| 182.0818          | -1.9032 | 0.060365 | 0.33392 |



|                |         |          |         |
|----------------|---------|----------|---------|
| 485.3228       | 1.8945  | 0.061516 | 0.33392 |
| xylose         | 1.8919  | 0.061863 | 0.33392 |
| 309.2179       | -1.8902 | 0.062093 | 0.33392 |
| 228.1600       | -1.8728 | 0.064488 | 0.34163 |
| 358.2423       | -1.867  | 0.065312 | 0.34163 |
| 446.2907       | -1.8646 | 0.065644 | 0.34163 |
| 305.2117       | -1.8416 | 0.068974 | 0.35514 |
| 248.9599       | -1.83   | 0.070719 | 0.35523 |
| 383.3270       | -1.8259 | 0.071336 | 0.35523 |
| Indoleacrylate | 1.8233  | 0.07173  | 0.35523 |
| 627.5379       | -1.8182 | 0.072519 | 0.35523 |
| 242.1757       | -1.8173 | 0.072661 | 0.35523 |
| 320.2224       | 1.8114  | 0.073566 | 0.35606 |
| 170.0431       | 1.8027  | 0.074937 | 0.35664 |
| Phenylalanine  | 1.7967  | 0.0759   | 0.35664 |
| 399.2857       | -1.7789 | 0.078797 | 0.35664 |
| 119.0347       | -1.7776 | 0.079007 | 0.35664 |
| 241.1079       | -1.7762 | 0.079235 | 0.35664 |
| 328.2124       | 1.7745  | 0.079512 | 0.35664 |
| 238.1081       | -1.7744 | 0.079538 | 0.35664 |
| 448.2698       | -1.7741 | 0.079581 | 0.35664 |
| 169.0866       | 1.7632  | 0.081417 | 0.3614  |
| 302.1966       | -1.759  | 0.082137 | 0.3614  |
| 250.1809       | -1.7359 | 0.086168 | 0.37278 |
| 318.2108       | -1.7353 | 0.086264 | 0.37278 |
| 338.2332       | -1.7261 | 0.087917 | 0.37562 |
| 334.2019       | -1.7076 | 0.091327 | 0.37562 |
| 370.2785       | -1.7037 | 0.092046 | 0.37562 |
| 135.0813       | -1.701  | 0.092548 | 0.37562 |
| 312.2174       | -1.6988 | 0.092981 | 0.37562 |
| 113.0970       | -1.6911 | 0.094435 | 0.37562 |
| 255.1234       | -1.689  | 0.094848 | 0.37562 |
| 370.2589       | -1.6875 | 0.09514  | 0.37562 |
| 434.2542       | -1.6855 | 0.095511 | 0.37562 |
| Allantoin      | 1.6844  | 0.095732 | 0.37562 |
| 418.2593       | -1.6805 | 0.096497 | 0.37562 |
| 231.1790       | -1.678  | 0.09698  | 0.37562 |
| 371.2545       | -1.6757 | 0.097422 | 0.37562 |
| 381.2105       | -1.6739 | 0.097785 | 0.37562 |

**Table S10.** Metaboanalyst results from T-Test comparisons between sex (mare vs. gelding) for metabolites

| <b>Metabolite</b>           | <b>t.stat</b> | <b>p.value</b> | <b>FDR</b> |
|-----------------------------|---------------|----------------|------------|
| Creatine                    | -5.9958       | 4.63E-08       | 2.24E-05   |
| Cystine                     | -5.7997       | 1.08E-07       | 2.61E-05   |
| Alanine/Sarcosine           | -5.5842       | 2.69E-07       | 3.81E-05   |
| Taurine                     | -5.547        | 3.15E-07       | 3.81E-05   |
| Serine                      | -5.3606       | 6.87E-07       | 5.91E-05   |
| Allantoin                   | -5.3451       | 7.32E-07       | 5.91E-05   |
| Glutamine                   | -5.286        | 9.35E-07       | 6.46E-05   |
| 165.128                     | 5.1739        | 1.48E-06       | 8.95E-05   |
| Valine/betaine              | -5.142        | 1.69E-06       | 9.07E-05   |
| Phenylalanine               | -4.7807       | 7.15E-06       | 0.000346   |
| alpha-Ketoglutarate         | -4.5786       | 1.57E-05       | 0.00069    |
| S-Adenosyl-L-methioninamine | -4.4384       | 2.67E-05       | 0.001079   |
| 213.1322                    | 4.2656        | 5.10E-05       | 0.001836   |
| Homoserine/Threonine        | -4.2546       | 5.31E-05       | 0.001836   |
| Uridine                     | -4.2359       | 5.69E-05       | 0.001836   |
| Tryptophan                  | -4.1614       | 7.47E-05       | 0.00226    |
| Indoleacrylate              | -4.1338       | 8.26E-05       | 0.002352   |
| xylose                      | -4.0584       | 0.000108       | 0.002916   |
| 434.2542                    | 3.8803        | 0.000204       | 0.005192   |
| Cystathionine               | -3.8212       | 0.00025        | 0.005779   |
| Tyrosine                    | -3.8207       | 0.000251       | 0.005779   |
| Ornithine                   | -3.7736       | 0.000295       | 0.006492   |
| Methionine                  | -3.6992       | 0.00038        | 0.008005   |
| 198.1018                    | 3.5296        | 0.000671       | 0.012935   |
| 188.1006                    | 3.5254        | 0.00068        | 0.012935   |
| 330.2281                    | 3.519         | 0.000695       | 0.012935   |
| 762.5618                    | 3.5059        | 0.000726       | 0.013007   |
| Citrulline                  | -3.4081       | 0.000997       | 0.017238   |
| 230.1545                    | 3.3378        | 0.001249       | 0.020815   |
| 229.1633                    | 3.3277        | 0.00129        | 0.020815   |
| 334.2020                    | 3.3095        | 0.001367       | 0.02134    |
| 128.1079                    | 3.2725        | 0.001536       | 0.023228   |
| 236.1652                    | 3.2016        | 0.001916       | 0.028105   |
| 278.1756                    | 3.1544        | 0.002216       | 0.031543   |
| 501.3041                    | 3.1256        | 0.00242        | 0.033461   |
| 383.2779                    | 3.0857        | 0.002731       | 0.036498   |
| 285.2177                    | 3.0743        | 0.002827       | 0.036498   |
| 261.1339                    | 3.0605        | 0.002947       | 0.036498   |
| 254.1395                    | 3.0601        | 0.002951       | 0.036498   |
| 292.1745                    | 3.0486        | 0.003054       | 0.036498   |
| 202.1081                    | 3.0446        | 0.003092       | 0.036498   |
| 414.3332                    | 2.9629        | 0.00394        | 0.045405   |
| 242.1757                    | 2.954         | 0.004045       | 0.045526   |
| 292.1914                    | 2.9366        | 0.004257       | 0.046823   |

|            |         |          |          |
|------------|---------|----------|----------|
| 305.1754   | 2.9216  | 0.004447 | 0.04747  |
| 311.2050   | 2.9167  | 0.004512 | 0.04747  |
| 177.1328   | 2.8571  | 0.005361 | 0.055202 |
| Creatinine | -2.8446 | 0.005557 | 0.055519 |
| 360.2385   | -2.8406 | 0.005621 | 0.055519 |
| 199.0972   | 2.8309  | 0.005778 | 0.055927 |
| 459.3049   | 2.8075  | 0.006176 | 0.058613 |
| 264.1318   | 2.791   | 0.006472 | 0.060243 |
| 326.1969   | 2.7521  | 0.007221 | 0.065279 |
| 269.2118   | 2.749   | 0.007283 | 0.065279 |
| 271.2104   | 2.7397  | 0.007476 | 0.065788 |
| 395.1682   | 2.7325  | 0.007628 | 0.065925 |
| 295.0518   | 2.7152  | 0.008004 | 0.067183 |
| 257.1392   | 2.7131  | 0.008051 | 0.067183 |
| 306.1787   | 2.6971  | 0.008417 | 0.069045 |
| 270.2072   | 2.6862  | 0.008672 | 0.069957 |
| 177.0597   | 2.6555  | 0.009436 | 0.074872 |
| 231.1790   | 2.6447  | 0.009717 | 0.075857 |
| 313.2130   | 2.6237  | 0.010289 | 0.079049 |
| 175.0858   | 2.6078  | 0.010744 | 0.081248 |
| 116.9722   | 2.5868  | 0.011367 | 0.084638 |
| 343.2594   | -2.5781 | 0.011637 | 0.085335 |
| 203.1115   | 2.5371  | 0.01298  | 0.093768 |
| 382.2746   | 2.5238  | 0.013446 | 0.095703 |
| 252.1237   | 2.5161  | 0.013723 | 0.096259 |
| 135.0813   | 2.5021  | 0.01424  | 0.098459 |
| 386.2910   | 2.4314  | 0.017115 | 0.11667  |
| 200.1288   | 2.4136  | 0.017919 | 0.12045  |
| 268.1913   | 2.4015  | 0.018483 | 0.12255  |
| 302.2332   | 2.394   | 0.018841 | 0.12296  |
| 322.2383   | 2.3896  | 0.019054 | 0.12296  |
| 175.1165   | 2.3784  | 0.019605 | 0.12485  |
| 422.2905   | 2.3731  | 0.01987  | 0.1249   |
| 277.1439   | 2.3291  | 0.022196 | 0.13543  |
| 398.2652   | 2.3274  | 0.022293 | 0.13543  |
| 202.1526   | 2.3258  | 0.022385 | 0.13543  |
| 248.9599   | 2.3145  | 0.023024 | 0.13758  |
| 137.0605   | 2.3009  | 0.023816 | 0.13996  |
| Uric acid  | -2.2978 | 0.024001 | 0.13996  |
| 293.0486   | 2.2905  | 0.024442 | 0.14083  |
| 141.0166   | 2.2775  | 0.025239 | 0.14371  |
| 248.1651   | 2.2689  | 0.02578  | 0.1445   |
| 184.1702   | 2.2658  | 0.025975 | 0.1445   |
| 409.2419   | -2.2509 | 0.026943 | 0.14819  |
| 441.3327   | -2.2168 | 0.029276 | 0.15921  |
| 227.1479   | 2.2024  | 0.030313 | 0.16249  |
| 242.1112   | 2.198   | 0.030634 | 0.16249  |
| 228.1600   | 2.1946  | 0.030886 | 0.16249  |
| 87.04483   | -2.1819 | 0.031847 | 0.16574  |

|          |         |          |         |
|----------|---------|----------|---------|
| 236.2016 | 2.1737  | 0.032477 | 0.16722 |
| 243.1233 | 2.1554  | 0.033921 | 0.17163 |
| 600.5022 | 2.154   | 0.034042 | 0.17163 |
| 446.2907 | 2.139   | 0.035271 | 0.17599 |
| 232.0134 | -2.126  | 0.036373 | 0.17964 |
| 386.2693 | 2.1128  | 0.037519 | 0.18343 |
| 463.3170 | 2.0963  | 0.03899  | 0.18786 |
| 466.2911 | 2.094   | 0.039203 | 0.18786 |
| 448.2698 | 2.0789  | 0.040607 | 0.19061 |
| 225.1492 | 2.0758  | 0.040899 | 0.19061 |
| 411.2857 | 2.0752  | 0.040958 | 0.19061 |
| 262.1807 | 2.0474  | 0.043667 | 0.20128 |
| 196.0612 | 2.0406  | 0.044354 | 0.20252 |
| 127.0010 | 2.0287  | 0.045582 | 0.20619 |
| 305.2117 | 2.0088  | 0.047693 | 0.21374 |
| 271.2103 | 1.9911  | 0.049641 | 0.22043 |
| 299.2053 | 1.9784  | 0.05109  | 0.22452 |
| 253.1441 | 1.9749  | 0.05149  | 0.22452 |
| 200.0536 | 1.9662  | 0.052501 | 0.22688 |
| 321.0795 | 1.9553  | 0.053792 | 0.2281  |
| 181.1231 | 1.9469  | 0.054805 | 0.2281  |
| 204.0914 | 1.9439  | 0.055178 | 0.2281  |
| 281.1863 | -1.943  | 0.055291 | 0.2281  |
| 461.3097 | 1.9426  | 0.055332 | 0.2281  |
| 238.1081 | 1.9404  | 0.055611 | 0.2281  |
| 202.0119 | 1.9337  | 0.056444 | 0.22957 |
| 263.1285 | 1.9211  | 0.058027 | 0.23404 |
| 339.1809 | 1.9106  | 0.059382 | 0.23753 |
| 187.0972 | 1.8881  | 0.062389 | 0.24751 |
| 356.2435 | 1.8838  | 0.062977 | 0.24781 |
| 322.2015 | 1.8795  | 0.063567 | 0.24812 |
| 145.0140 | 1.8686  | 0.065086 | 0.25113 |
| 293.1867 | 1.8569  | 0.066754 | 0.25113 |
| 284.2053 | -1.8565 | 0.066811 | 0.25113 |
| 322.1322 | 1.8517  | 0.067502 | 0.25113 |
| 214.1443 | 1.8497  | 0.067798 | 0.25113 |
| 315.1922 | 1.8487  | 0.067944 | 0.25113 |
| 294.2067 | -1.8441 | 0.068609 | 0.25113 |
| 369.1158 | 1.8412  | 0.069035 | 0.25113 |
| 252.1602 | 1.8397  | 0.069265 | 0.25113 |
| 434.2542 | 1.8379  | 0.069527 | 0.25113 |
| 598.4149 | 1.8252  | 0.071438 | 0.25612 |
| 209.1542 | 1.8182  | 0.072515 | 0.25689 |
| 399.2857 | 1.8165  | 0.072771 | 0.25689 |
| 212.1652 | 1.8127  | 0.073364 | 0.25689 |
| 284.1498 | 1.8101  | 0.073778 | 0.25689 |
| 146.8665 | 1.806   | 0.07441  | 0.25724 |
| 329.2159 | 1.7804  | 0.078534 | 0.26865 |
| 194.9461 | 1.7759  | 0.079281 | 0.26865 |

|          |         |          |         |
|----------|---------|----------|---------|
| 238.1445 | 1.7754  | 0.079374 | 0.26865 |
| 266.1509 | 1.7435  | 0.084821 | 0.28346 |
| 87.04486 | 1.7429  | 0.084922 | 0.28346 |
| 278.1473 | 1.7386  | 0.085682 | 0.28404 |
| 370.2785 | 1.735   | 0.086325 | 0.28423 |
| 156.9904 | 1.7264  | 0.087858 | 0.28732 |
| 292.1551 | 1.7208  | 0.088879 | 0.28756 |
| 230.1756 | 1.7195  | 0.089121 | 0.28756 |
| 248.2016 | 1.7092  | 0.091019 | 0.29174 |
| 229.1439 | -1.6991 | 0.092919 | 0.29393 |
| 370.2589 | -1.6973 | 0.093247 | 0.29393 |
| 327.2366 | 1.6959  | 0.093524 | 0.29393 |
| 397.2702 | 1.69    | 0.094657 | 0.29557 |
| 361.2014 | 1.675   | 0.097564 | 0.3027  |

**Table S11.** Metaboanalyst results from T-Test comparisons between age group (below 20 vs. 20 and above) for metabolites

| <b>Metabolite</b>    | <b>t.stat</b> | <b>p.value</b> | <b>FDR</b> |
|----------------------|---------------|----------------|------------|
| Creatine             | 4.8452        | 5.55E-06       | 0.002685   |
| Alanine/Sarcosine    | 3.5068        | 0.000723       | 0.17503    |
| 181.1231             | -2.7932       | 0.006432       | 0.94452    |
| Methionine           | 2.3907        | 0.019          | 0.94452    |
| Allantoin            | 2.3768        | 0.019682       | 0.94452    |
| 135.0813             | -2.3649       | 0.020287       | 0.94452    |
| 87.04483             | 2.2813        | 0.025001       | 0.94452    |
| 285.1258             | 2.1792        | 0.032048       | 0.94452    |
| 238.1445             | 2.0992        | 0.038733       | 0.94452    |
| Uridine              | 2.0911        | 0.039469       | 0.94452    |
| 250.1809             | 2.0403        | 0.044385       | 0.94452    |
| Homoserine/Threonine | 1.9935        | 0.049377       | 0.94452    |
| 202.1081             | -1.9614       | 0.053073       | 0.94452    |
| 248.2016             | -1.9523       | 0.05415        | 0.94452    |
| 279.2435             | 1.9481        | 0.054662       | 0.94452    |
| 397.2702             | -1.9272       | 0.057254       | 0.94452    |
| 293.1754             | -1.9191       | 0.058289       | 0.94452    |
| Indoleacrylate       | 1.9185        | 0.058369       | 0.94452    |
| 380.2437             | -1.9146       | 0.058869       | 0.94452    |
| 199.0972             | 1.9143        | 0.058904       | 0.94452    |
| 294.2067             | -1.8887       | 0.062307       | 0.94452    |
| alpha-Ketoglutarate  | 1.853         | 0.067316       | 0.94452    |
| 360.2385             | 1.8411        | 0.069059       | 0.94452    |
| 277.1805             | 1.8285        | 0.070937       | 0.94452    |
| 283.1029             | -1.8083       | 0.074053       | 0.94452    |
| 162.965              | -1.7913       | 0.076758       | 0.94452    |
| 292.1914             | -1.7761       | 0.079248       | 0.94452    |
| 231.1790             | -1.7611       | 0.081783       | 0.94452    |
| 204.0914             | -1.7586       | 0.082207       | 0.94452    |
| 125.7532             | -1.7512       | 0.083474       | 0.94452    |
| 250.1444             | -1.7423       | 0.085038       | 0.94452    |
| 514.3166             | 1.7407        | 0.085315       | 0.94452    |
| 223.1335             | -1.7371       | 0.085958       | 0.94452    |
| N-Acetylornithine    | -1.7341       | 0.086487       | 0.94452    |
| 299.2048             | 1.7182        | 0.089361       | 0.94452    |
| 330.2281             | -1.6951       | 0.093683       | 0.94452    |
| 271.2103             | -1.6888       | 0.094873       | 0.94452    |
| 311.2224             | -1.6809       | 0.096407       | 0.94452    |
| Tyrosine             | 1.6773        | 0.097109       | 0.94452    |

**Table S12.** Metaboanalyst results from PLS-DA VIP comparisons between diet (C vs. S) metabolomic profiles

| Metabolite                  | Comp. 1 | Comp. 2 | Comp. 3 | Comp. 4 | Comp. 5 |
|-----------------------------|---------|---------|---------|---------|---------|
| Allantoin                   | 4.9501  | 3.4884  | 3.2075  | 3.1004  | 3.033   |
| Creatine                    | 4.8721  | 3.4723  | 3.1908  | 3.0151  | 2.9872  |
| Taurine                     | 4.8263  | 3.4319  | 3.1531  | 2.9823  | 2.914   |
| Indoleacrylate              | 4.7862  | 3.6691  | 3.3831  | 3.2227  | 3.1766  |
| S-Adenosyl-L-methioninamine | 4.7471  | 4.0184  | 3.6936  | 3.4939  | 3.4125  |
| Cystine                     | 4.5001  | 3.1606  | 2.9134  | 2.784   | 2.7274  |
| Valine/betaine              | 4.4518  | 3.2091  | 2.9628  | 2.7975  | 2.7346  |
| alpha-Ketoglutarate         | 4.0085  | 3.1742  | 2.9163  | 2.766   | 2.699   |
| Uridine                     | 3.8664  | 3.4838  | 3.2065  | 3.0297  | 2.956   |
| Glutamine                   | 3.8059  | 2.7835  | 2.5578  | 2.4153  | 2.3603  |
| Phenylalanine               | 3.535   | 2.6187  | 2.4116  | 2.277   | 2.2217  |
| Alanine/Sarcosine           | 3.438   | 2.4322  | 2.2347  | 2.1242  | 2.0727  |
| Serine                      | 3.1169  | 2.2314  | 2.0503  | 1.9698  | 1.9236  |
| Ornithine                   | 3.0492  | 3.1175  | 2.8683  | 2.7095  | 2.6437  |
| Methionine                  | 3.0301  | 3.214   | 2.9647  | 2.7989  | 2.7305  |
| Homoserine/Threonine        | 2.8964  | 2.4632  | 2.2638  | 2.1485  | 2.0962  |
| Tryptophan                  | 2.835   | 2.1139  | 2.0102  | 1.9509  | 1.9282  |
| 194.9461                    | 2.8027  | 2.6944  | 3.7282  | 3.5238  | 3.5877  |
| 463.3170                    | 2.7781  | 2.011   | 1.9204  | 1.937   | 1.8989  |
| Tyrosine                    | 2.7355  | 2.5918  | 2.3815  | 2.2817  | 2.2261  |
| 214.1443                    | 2.6734  | 3.0823  | 3.0728  | 3.3626  | 3.3273  |
| Uric acid                   | 2.5831  | 4.6735  | 4.3362  | 4.0947  | 3.9965  |
| Cystathionine               | 2.5711  | 2.2546  | 2.0714  | 1.9564  | 1.9098  |
| Citrulline                  | 2.4915  | 2.8205  | 2.5942  | 2.4495  | 2.3904  |
| 395.1682                    | 2.4507  | 2.8571  | 2.6653  | 2.7535  | 2.7142  |
| Creatinine                  | 2.3691  | 3.3959  | 3.1291  | 2.9691  | 2.8971  |
| xylose                      | 2.2443  | 2.0368  | 1.872   | 1.7821  | 1.7405  |
| 322.2015                    | 2.027   | 2.4769  | 2.4224  | 2.313   | 2.4962  |
| 284.2053                    | 2.0061  | 2.6226  | 2.4244  | 2.5722  | 2.5262  |
| 321.0795                    | 1.8318  | 1.994   | 1.9013  | 2.2998  | 2.2627  |
| 299.2048                    | 1.8256  | 1.3645  | 1.3763  | 1.335   | 2.183   |
| 295.0518                    | 1.7991  | 1.8614  | 2.1115  | 2.0306  | 1.9843  |
| 477.3249                    | 1.6924  | 1.1894  | 1.1017  | 1.2197  | 1.1916  |
| 292.1745                    | 1.6447  | 1.7441  | 1.6752  | 1.6095  | 1.6193  |
| 441.3327                    | 1.6379  | 1.5059  | 1.4983  | 1.4342  | 1.4195  |
| 343.2594                    | 1.6062  | 1.4851  | 1.3769  | 1.3693  | 1.376   |
| 204.0914                    | 1.6029  | 1.8377  | 2.048   | 1.9345  | 1.9329  |
| 434.2542                    | 1.5656  | 1.7131  | 1.5808  | 1.4925  | 1.4585  |
| 326.2331                    | 1.5202  | 2.1434  | 2.0129  | 1.9118  | 1.9364  |
| 237.1606                    | 1.5126  | 1.7105  | 1.5715  | 1.4883  | 1.683   |
| 87.04483                    | 1.5098  | 1.8048  | 1.6754  | 1.5994  | 1.5724  |
| 229.1439                    | 1.5094  | 1.2294  | 1.3564  | 1.2816  | 1.2506  |
| N-Acetylornithine           | 1.507   | 3.972   | 3.6522  | 3.5013  | 3.424   |
| 296.1342                    | 1.4791  | 1.0602  | 2.4472  | 2.3665  | 2.3111  |

|          |        |         |         |         |         |
|----------|--------|---------|---------|---------|---------|
| 424.2334 | 1.4481 | 2.7872  | 2.7286  | 2.7146  | 2.6894  |
| 196.0612 | 1.4145 | 1.4946  | 1.4031  | 1.5087  | 1.5806  |
| 209.0040 | 1.3924 | 0.98275 | 0.90303 | 0.97889 | 1.055   |
| 360.2385 | 1.3767 | 1.7957  | 1.6721  | 1.5883  | 1.6     |
| 227.1479 | 1.3024 | 1.8885  | 1.8066  | 1.7583  | 1.7184  |
| 309.0675 | 1.2857 | 1.5789  | 2.1871  | 2.1521  | 2.1108  |
| 200.0536 | 1.2722 | 1.8829  | 2.043   | 1.9892  | 1.9453  |
| 422.2905 | 1.2542 | 1.7093  | 1.5764  | 1.498   | 1.5088  |
| 232.0134 | 1.2493 | 1.5029  | 1.4876  | 1.4064  | 1.3727  |
| 145.0140 | 1.2434 | 1.633   | 1.5393  | 1.4544  | 1.4223  |
| 202.0119 | 1.2332 | 1.0567  | 1.3939  | 1.4095  | 1.3761  |
| 217.0025 | 1.21   | 1.2793  | 1.5695  | 2.0248  | 1.9763  |
| 141.0166 | 1.1985 | 1.5218  | 1.4514  | 1.3843  | 1.3513  |
| 309.2177 | 1.1834 | 1.6768  | 1.5424  | 1.6344  | 1.6999  |
| 313.213  | 1.1788 | 0.88801 | 0.94457 | 0.93209 | 0.90931 |
| 394.2595 | 1.1691 | 0.87869 | 0.80776 | 0.89406 | 0.87237 |
| 248.9599 | 1.1363 | 0.85547 | 0.83697 | 0.79013 | 0.77153 |
| 127.0010 | 1.1241 | 0.92074 | 0.84595 | 0.87431 | 0.87469 |
| 209.1178 | 1.121  | 0.81248 | 0.74694 | 0.7117  | 0.69711 |
| 322.2383 | 1.114  | 0.8374  | 0.83815 | 0.81635 | 0.80987 |
| 250.1082 | 1.0935 | 1.5441  | 1.4187  | 1.3779  | 1.3552  |
| 299.2053 | 1.0894 | 1.0323  | 0.99137 | 0.94868 | 0.9839  |
| 283.1029 | 1.0796 | 0.96795 | 1.2585  | 1.2208  | 1.2154  |
| 143.0346 | 1.0151 | 1.5563  | 1.4793  | 1.448   | 1.468   |
| 292.1914 | 1.015  | 0.98244 | 0.90565 | 0.88066 | 0.88378 |
| 279.1631 | 1.0101 | 0.80698 | 0.74912 | 0.73298 | 0.7583  |



**Table S13.** Metaboanalyst results from PLS-DA VIP comparisons between sex (mare vs. gelding) metabolomic profiles

| <b>Metabolite</b>           | <b>Comp. 1</b> | <b>Comp. 2</b> | <b>Comp. 3</b> | <b>Comp. 4</b> | <b>Comp. 5</b> |
|-----------------------------|----------------|----------------|----------------|----------------|----------------|
| N-Acetylornithine           | 4.6122         | 2.7464         | 2.6083         | 2.5508         | 2.4743         |
| S-Adenosyl-L-methioninamine | 4.5062         | 3.8014         | 3.4374         | 3.3589         | 3.2789         |
| Taurine                     | 4.4276         | 3.099          | 2.8106         | 2.7545         | 2.6736         |
| 477.3249                    | 3.7725         | 2.5006         | 2.5979         | 2.5472         | 2.4868         |
| Cystine                     | 3.7042         | 2.8596         | 2.5938         | 2.5346         | 2.4733         |
| 119.0347                    | 3.6513         | 2.497          | 2.4127         | 2.3909         | 2.3259         |
| 326.2331                    | 3.5285         | 3.2147         | 3.1868         | 3.1552         | 3.0891         |
| Glutamine                   | 3.4776         | 2.5838         | 2.3349         | 2.2831         | 2.2219         |
| Uridine                     | 3.4568         | 3.297          | 2.9806         | 2.917          | 2.8339         |
| Valine/betaine              | 3.2835         | 3.2054         | 2.8981         | 2.8327         | 2.7477         |
| Ornithine                   | 3.2767         | 2.7548         | 2.4914         | 2.4345         | 2.3752         |
| alpha-Ketoglutarate         | 3.2292         | 3.0931         | 2.8172         | 2.7717         | 2.6885         |
| Indoleacrylate              | 3.1791         | 4.0033         | 3.6177         | 3.5361         | 3.4389         |
| Methionine                  | 3.1725         | 2.7677         | 2.5456         | 2.5009         | 2.4255         |
| 209.0040                    | 3.1425         | 4.315          | 4.2853         | 4.2282         | 4.1008         |
| 322.2015                    | 3.04           | 2.3999         | 2.2063         | 2.2872         | 2.2402         |
| Citrulline                  | 3.0364         | 2.3858         | 2.1561         | 2.1097         | 2.0642         |
| 194.9461                    | 2.9192         | 2.3321         | 3.1983         | 3.5322         | 3.4552         |
| Homoserine/Threonine        | 2.663          | 2.3083         | 2.0955         | 2.0495         | 1.9937         |
| 169.0866                    | 2.5269         | 2.3755         | 2.1607         | 2.1137         | 2.0508         |
| Allantoin                   | 2.4832         | 3.7456         | 3.4309         | 3.353          | 3.2783         |
| 155.0014                    | 2.3423         | 1.5706         | 1.51           | 1.5454         | 1.5181         |
| 374.9682                    | 2.3225         | 1.9613         | 1.7785         | 1.7602         | 1.715          |
| 336.1812                    | 2.2992         | 2.4654         | 2.3842         | 2.3339         | 2.2687         |
| Creatine                    | 2.2026         | 3.0439         | 2.7927         | 2.7317         | 2.6537         |
| Serine                      | 2.1247         | 2.129          | 1.9373         | 1.8966         | 1.8487         |
| 538.9967                    | 2.0828         | 1.5964         | 1.5852         | 1.6558         | 1.606          |
| Phenylalanine               | 2.0569         | 2.8431         | 2.5872         | 2.5291         | 2.4533         |
| Alanine/Sarcosine           | 2.0389         | 2.4413         | 2.2105         | 2.1642         | 2.1018         |
| 217.0293                    | 2.0124         | 1.5461         | 1.4304         | 1.4255         | 1.4709         |
| 334.2019                    | 1.8903         | 1.7472         | 1.6692         | 1.6388         | 1.6058         |
| 449.2626                    | 1.8811         | 1.6719         | 1.7477         | 1.7627         | 1.7237         |
| 283.1029                    | 1.8645         | 1.7141         | 1.5722         | 1.5366         | 1.6324         |
| 170.0431                    | 1.8148         | 1.1521         | 1.043          | 1.1686         | 1.2328         |
| 315.0411                    | 1.7889         | 1.0805         | 2.7849         | 2.7755         | 2.7513         |
| 238.1445                    | 1.7881         | 1.5043         | 1.4592         | 1.4268         | 1.3854         |
| 279.1631                    | 1.7544         | 1.2388         | 1.1196         | 1.1103         | 1.0941         |
| Creatinine                  | 1.7387         | 3.1456         | 2.8726         | 2.8177         | 2.7333         |
| 380.2437                    | 1.7321         | 1.4209         | 1.2938         | 1.2644         | 1.2286         |
| 320.2224                    | 1.7285         | 1.8757         | 1.7419         | 1.7026         | 1.6533         |
| 360.9761                    | 1.6988         | 1.2662         | 1.1543         | 1.1457         | 1.1773         |
| 334.2381                    | 1.6589         | 0.9963         | 0.9043         | 1.0228         | 1.0482         |
| Tyrosine                    | 1.6248         | 2.8504         | 2.5879         | 2.5305         | 2.4568         |

|               |        |         |         |         |         |
|---------------|--------|---------|---------|---------|---------|
| 408.2749      | 1.6243 | 1.0836  | 0.98304 | 0.96066 | 0.94297 |
| 256.1600      | 1.5781 | 1.0323  | 1.0882  | 1.1884  | 1.3215  |
| xylose        | 1.5686 | 2.095   | 1.903   | 1.8661  | 1.8107  |
| 209.1178      | 1.5571 | 0.95751 | 0.89185 | 0.88722 | 0.87904 |
| 214.1443      | 1.5302 | 3.2454  | 3.0311  | 2.9863  | 3.2695  |
| 369.2392      | 1.5015 | 1.4415  | 1.5275  | 1.4938  | 1.4526  |
| 355.2233      | 1.477  | 0.9411  | 0.86252 | 0.87475 | 0.86774 |
| 356.2435      | 1.4736 | 1.0805  | 0.97672 | 0.9564  | 0.92761 |
| 398.2686      | 1.4132 | 0.8541  | 0.77577 | 0.76413 | 0.74113 |
| 286.2018      | 1.403  | 1.0174  | 1.0373  | 1.016   | 0.99024 |
| Arginine      | 1.3976 | 0.8356  | 0.87335 | 0.85932 | 0.84733 |
| 94.9249       | 1.3717 | 1.7353  | 1.7333  | 1.6977  | 1.7106  |
| 182.0818      | 1.3609 | 1.0429  | 1.0078  | 0.98536 | 0.9562  |
| 250.1809      | 1.3487 | 0.96793 | 0.89914 | 0.87862 | 0.85236 |
| Tryptophan    | 1.332  | 2.6252  | 2.3751  | 2.3225  | 2.2556  |
| 141.0748      | 1.3215 | 1.042   | 0.95401 | 0.93354 | 1.0327  |
| Cystathionine | 1.3152 | 2.6717  | 2.4154  | 2.3616  | 2.2903  |
| 295.0518      | 1.2997 | 1.1225  | 1.0294  | 1.1905  | 1.3211  |
| 166.0174      | 1.2963 | 0.82538 | 1.1037  | 1.1013  | 1.6166  |
| 307.1547      | 1.2887 | 1.4103  | 1.4599  | 1.4313  | 1.3881  |
| 369.2747      | 1.2845 | 1.3925  | 1.37    | 1.3681  | 1.3276  |
| 248.9599      | 1.2734 | 0.75351 | 0.70985 | 0.74315 | 0.73527 |
| 485.3228      | 1.2656 | 1.1919  | 1.2109  | 1.2148  | 1.207   |
| 87.04485      | 1.2615 | 0.80875 | 1.391   | 1.4474  | 1.4764  |
| 201.1006      | 1.2447 | 0.73904 | 1.1097  | 1.0869  | 1.2637  |
| 309.2179      | 1.2188 | 1.0354  | 1.0245  | 1.0045  | 0.97922 |
| 252.9047      | 1.2053 | 0.72081 | 0.81513 | 0.85076 | 0.95009 |
| 145.0140      | 1.1686 | 1.042   | 1.0794  | 1.0552  | 1.0991  |
| 598.4149      | 1.1626 | 0.76085 | 0.68779 | 0.67233 | 0.65223 |
| 224.0229      | 1.1593 | 0.69138 | 0.67774 | 0.73596 | 0.95503 |
| 299.2048      | 1.1519 | 1.1716  | 1.0684  | 1.0468  | 1.2782  |
| 264.2157      | 1.1403 | 1.0759  | 1.0214  | 1.0019  | 0.97608 |
| 358.2423      | 1.1373 | 0.8818  | 0.80396 | 0.78561 | 0.7621  |
| 87.04487      | 1.1322 | 1.0606  | 0.96167 | 0.95096 | 0.93069 |
| 162.965       | 1.1222 | 0.73095 | 0.68748 | 0.69619 | 0.74118 |
| 146.8665      | 1.117  | 0.66184 | 0.61072 | 0.59729 | 0.64741 |
| 376.2965      | 1.1119 | 1.0723  | 1.0154  | 0.99911 | 1.0056  |
| 422.2905      | 1.108  | 1.3894  | 1.2603  | 1.2366  | 1.1995  |
| 300.2057      | 1.1067 | 1.0653  | 0.96338 | 0.9445  | 0.9471  |
| 220.0975      | 1.1031 | 1.288   | 1.2629  | 1.2612  | 1.2252  |
| 296.1342      | 1.0932 | 3.011   | 3.1844  | 3.2669  | 3.1915  |
| 361.2703      | 1.0879 | 1.0272  | 0.9569  | 0.94324 | 0.91532 |
| 87.04485      | 1.0855 | 0.77261 | 0.8228  | 0.81801 | 0.7951  |
| 200.0536      | 1.0481 | 0.84324 | 0.83847 | 0.89018 | 1.2022  |
| 315.1922      | 1.0391 | 0.68012 | 0.90106 | 0.88379 | 0.85868 |
| 271.2103      | 1.0327 | 0.66583 | 0.65403 | 0.64411 | 0.6275  |
| 441.3327      | 1.0293 | 0.67446 | 0.61239 | 0.61437 | 0.59589 |

|          |        |         |         |         |         |
|----------|--------|---------|---------|---------|---------|
| 399.3218 | 1.027  | 0.70108 | 0.64542 | 0.66769 | 0.64837 |
| 227.1479 | 1.0266 | 1.3631  | 1.2597  | 1.2322  | 1.1988  |
| 191.0711 | 1.0138 | 0.76485 | 0.69987 | 0.68429 | 0.73976 |
| 396.2747 | 1.0134 | 0.61509 | 0.55663 | 0.55663 | 0.55337 |
| 218.1183 | 1.0056 | 1.727   | 1.5622  | 1.5796  | 1.5385  |
| 355.2485 | 1.0005 | 0.86667 | 1.3004  | 1.3596  | 1.3509  |

**Table S14.** Metaboanalyst results from PLS-DA VIP comparisons between age group (below 20 vs. 20 and above) metabolomic profiles

| <b>Metabolite</b>           | <b>Comp.<br/>1</b> | <b>Comp.<br/>2</b> | <b>Comp.<br/>3</b> | <b>Comp.<br/>4</b> | <b>Comp.<br/>5</b> |
|-----------------------------|--------------------|--------------------|--------------------|--------------------|--------------------|
| S-Adenosyl-L-methioninamine | 5.445              | 4.0496             | 3.7989             | 3.5455             | 3.4216             |
| Taurine                     | 5.0164             | 3.5786             | 3.3539             | 3.1447             | 3.0314             |
| Cystine                     | 4.8323             | 3.4417             | 3.2265             | 3.0163             | 2.9069             |
| N-Acetylornithine           | 4.1585             | 2.9657             | 2.827              | 2.6516             | 2.5685             |
| Indoleacrylate              | 4.1357             | 3.8846             | 3.64               | 3.405              | 3.2877             |
| Glutamine                   | 4.1205             | 2.9452             | 2.7597             | 2.5785             | 2.4851             |
| Valine/betaine              | 4.0921             | 3.223              | 3.02               | 2.8268             | 2.7248             |
| Uridine                     | 4.086              | 3.4327             | 3.2277             | 3.0126             | 2.9031             |
| alpha-Ketoglutarate         | 3.9437             | 3.2077             | 3.0066             | 2.8149             | 2.7165             |
| Ornithine                   | 3.8582             | 2.9242             | 2.7407             | 2.558              | 2.4717             |
| Methionine                  | 3.7755             | 2.9383             | 2.7531             | 2.5852             | 2.4927             |
| Uric acid                   | 3.5274             | 3.5959             | 3.3955             | 3.4184             | 3.3549             |
| Allantoin                   | 3.5254             | 3.6762             | 3.5286             | 3.3022             | 3.1876             |
| Citrulline                  | 3.2921             | 2.545              | 2.3869             | 2.2315             | 2.1652             |
| Homoserine/Threonine        | 3.2867             | 2.4637             | 2.3092             | 2.158              | 2.088              |
| Creatine                    | 3.0556             | 2.9816             | 2.849              | 2.6597             | 2.565              |
| 194.9461                    | 3.0432             | 3.3114             | 4.3203             | 4.0326             | 4.0193             |
| Serine                      | 3.0153             | 2.2175             | 2.0798             | 1.9919             | 1.9203             |
| Alanine/Sarcosine           | 2.8701             | 2.3786             | 2.2393             | 2.0935             | 2.0175             |
| Creatinine                  | 2.8224             | 2.9738             | 2.787              | 2.629              | 2.539              |
| Phenylalanine               | 2.7477             | 2.8181             | 2.641              | 2.4714             | 2.3821             |
| Tyrosine                    | 2.4668             | 2.7718             | 2.6003             | 2.4309             | 2.3437             |
| 326.2331                    | 2.4651             | 3.546              | 3.3289             | 3.2358             | 3.1576             |
| 477.3249                    | 2.3723             | 1.8316             | 1.8528             | 1.9747             | 2.0985             |
| xylose                      | 2.2077             | 2.0528             | 1.9254             | 1.8065             | 1.7437             |
| 322.2015                    | 2.194              | 2.5818             | 2.4322             | 2.4738             | 2.6208             |
| 119.0347                    | 2.1166             | 1.7105             | 1.6058             | 1.6653             | 1.61               |
| Tryptophan                  | 2.0611             | 2.4767             | 2.322              | 2.1673             | 2.1102             |
| 299.2048                    | 1.9299             | 1.379              | 1.3141             | 1.4401             | 1.5558             |
| Cystathionine               | 1.8741             | 2.7465             | 2.5771             | 2.4053             | 2.3225             |
| 374.9682                    | 1.8727             | 2.5293             | 2.4388             | 2.3304             | 2.2519             |
| 315.0411                    | 1.6888             | 1.5087             | 1.8717             | 1.9391             | 2.2111             |
| 295.0518                    | 1.6797             | 1.9585             | 1.9475             | 2.1568             | 2.0788             |
| 169.0866                    | 1.6732             | 2.4199             | 2.2785             | 2.1373             | 2.1004             |
| 217.0293                    | 1.642              | 1.9415             | 1.8222             | 1.7401             | 1.8112             |
| Arginine                    | 1.6099             | 1.2599             | 1.2365             | 1.1789             | 1.1481             |
| 283.1029                    | 1.4611             | 1.8156             | 1.7046             | 1.7263             | 1.7682             |
| 441.3327                    | 1.4343             | 1.1907             | 1.1962             | 1.1186             | 1.106              |

|          |        |         |         |         |         |
|----------|--------|---------|---------|---------|---------|
| 209.1178 | 1.4143 | 1.1904  | 1.1156  | 1.0447  | 1.0338  |
| 238.1445 | 1.3755 | 1.6677  | 1.6304  | 1.5968  | 1.544   |
| 369.2392 | 1.3528 | 2.0318  | 2.0405  | 1.9723  | 1.9122  |
| 237.1606 | 1.3476 | 1.3409  | 1.4723  | 1.5837  | 1.539   |
| 538.9967 | 1.33   | 1.4956  | 1.7762  | 1.666   | 1.6408  |
| 155.0014 | 1.3156 | 0.96587 | 1.0633  | 1.0718  | 1.053   |
| 380.2437 | 1.3055 | 1.5971  | 1.4993  | 1.4102  | 1.3596  |
| 408.2749 | 1.2937 | 1.1535  | 1.0839  | 1.055   | 1.0346  |
| 286.2018 | 1.2628 | 1.3441  | 1.3333  | 1.2752  | 1.2552  |
| 309.0675 | 1.2254 | 1.8438  | 2.0162  | 2.2583  | 2.2016  |
| 399.3218 | 1.2042 | 1.2757  | 1.1955  | 1.175   | 1.133   |
| 485.3228 | 1.198  | 1.78    | 1.7366  | 1.6419  | 1.6285  |
| 334.2381 | 1.1972 | 0.85517 | 0.80235 | 0.88246 | 1.132   |
| 395.1682 | 1.1914 | 0.94877 | 1.1244  | 1.2343  | 1.2608  |
| 449.2626 | 1.1891 | 1.3553  | 1.2982  | 1.3298  | 1.3272  |
| 336.1812 | 1.1882 | 2.0132  | 1.976   | 1.8559  | 1.8056  |
| 334.2019 | 1.1879 | 1.5683  | 1.5128  | 1.4139  | 1.4793  |
| 376.2965 | 1.1823 | 1.9729  | 1.8915  | 1.7807  | 1.8134  |
| 182.0818 | 1.1641 | 1.3286  | 1.2533  | 1.1833  | 1.1404  |
| 360.9761 | 1.1332 | 1.3087  | 1.3609  | 1.3213  | 1.3057  |
| 162.9650 | 1.0738 | 0.88868 | 0.86438 | 0.89114 | 0.86929 |
| 321.0795 | 1.0691 | 0.97485 | 1.0362  | 1.3647  | 2.007   |
| 204.0914 | 1.0683 | 1.2435  | 1.3395  | 1.4923  | 1.5794  |
| 322.2383 | 1.0542 | 0.77682 | 0.78596 | 0.73541 | 0.7638  |
| 309.2179 | 1.026  | 1.3366  | 1.3356  | 1.2903  | 1.2557  |
| 279.1631 | 1.0219 | 0.80418 | 0.75794 | 0.7375  | 0.7558  |
| 398.2686 | 1.0175 | 0.73318 | 0.69693 | 0.72276 | 0.71307 |
| 356.2435 | 1.0161 | 0.93123 | 0.87943 | 0.85109 | 0.82781 |
| 598.4149 | 1.011  | 0.93119 | 0.8794  | 0.82136 | 0.79514 |
| 399.1823 | 1.0072 | 0.76684 | 1.1087  | 1.6017  | 1.5692  |
